# Supplementary material for: Metallic oxide nanoparticle translocation across the human bronchial epithelial barrier
Source: Royal Society of Chemistry journal article supplement (doi:10.1039/c4nr07079h), 2015-01-01

Size Distribution by Intensity

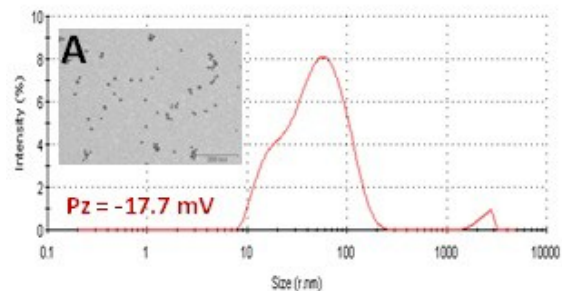

Size Distribution by Intensity

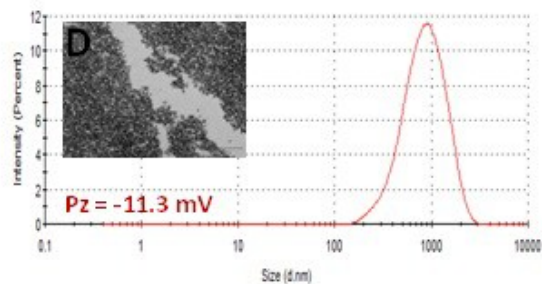

Size Distribution by Intensity

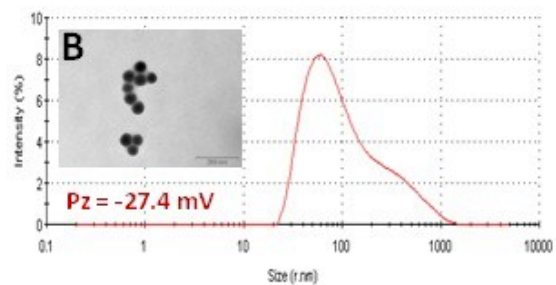

Size Distribution by Intensity

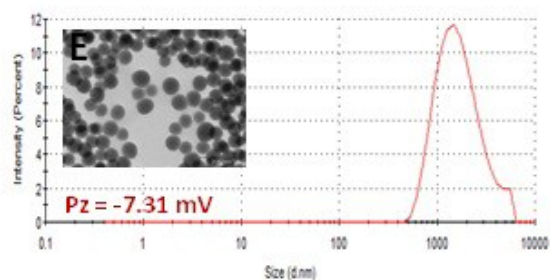

Size Distribution by Intensity

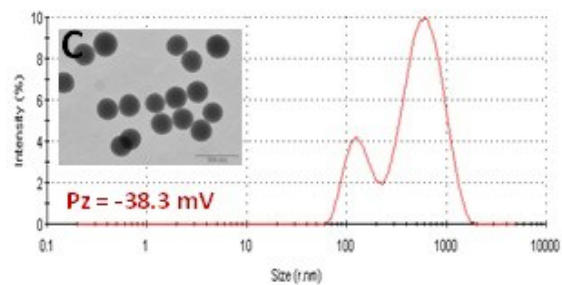

Size Distribution by Intensity

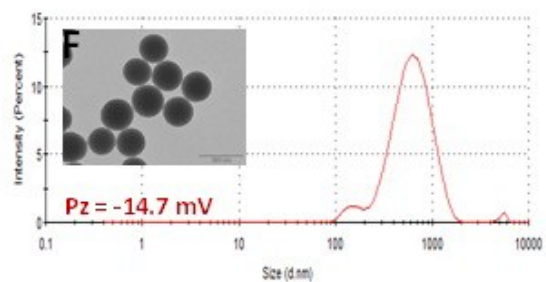

Size Distribution by Intensity

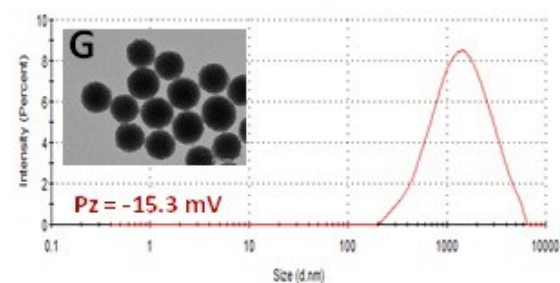

Supplement: c4nr07079h3.pdf [file c4nr07079h3.pdf]
