# Supplementary figures and images for: Metallic oxide nanoparticle translocation across the human bronchial epithelial barrier
Source: Royal Society of Chemistry journal article supplement (doi:10.1039/c4nr07079h), 2015-01-01

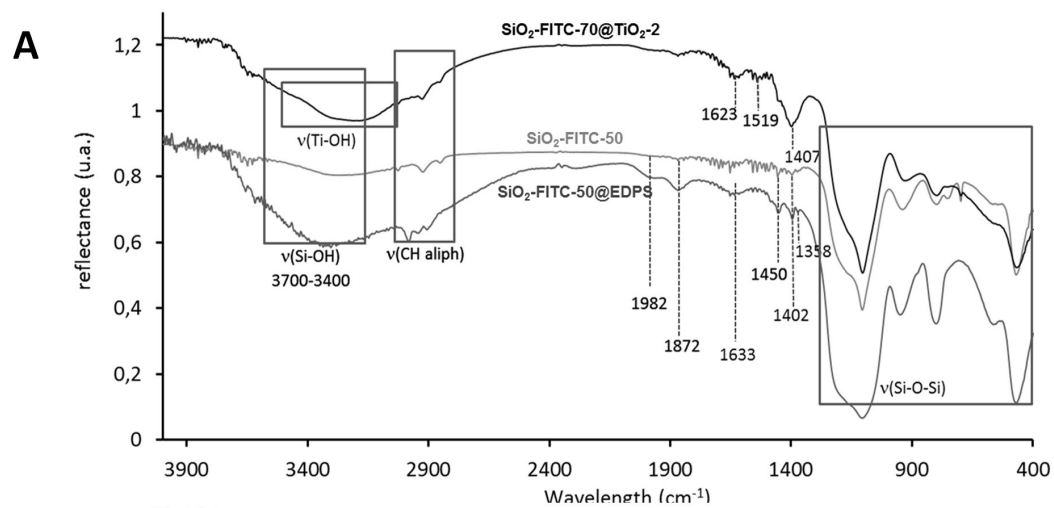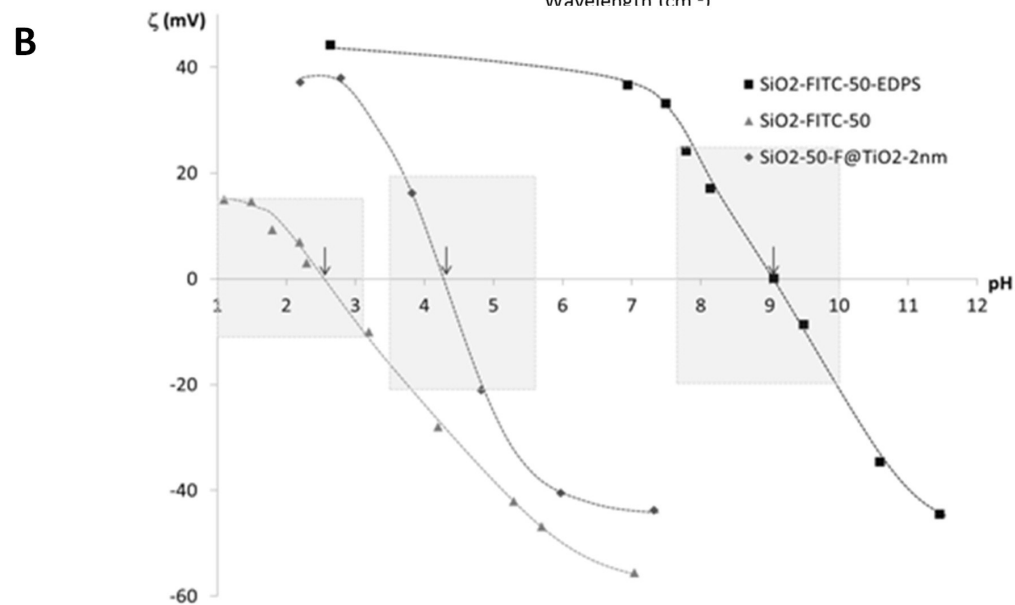

**C**

|                            | $e_{\text{calc}}$ | %w/w $\text{SiO}_2/\text{TiO}_2$ | %mol $\text{SiO}_2/\text{TiO}_2$ |
|----------------------------|-------------------|----------------------------------|----------------------------------|
| 140F/TiO <sub>2</sub> -2nm | 1,0               | 92/8                             | 97 / 3                           |

Supplement: c4nr07079h4.pdf [file c4nr07079h4.pdf]

**A**

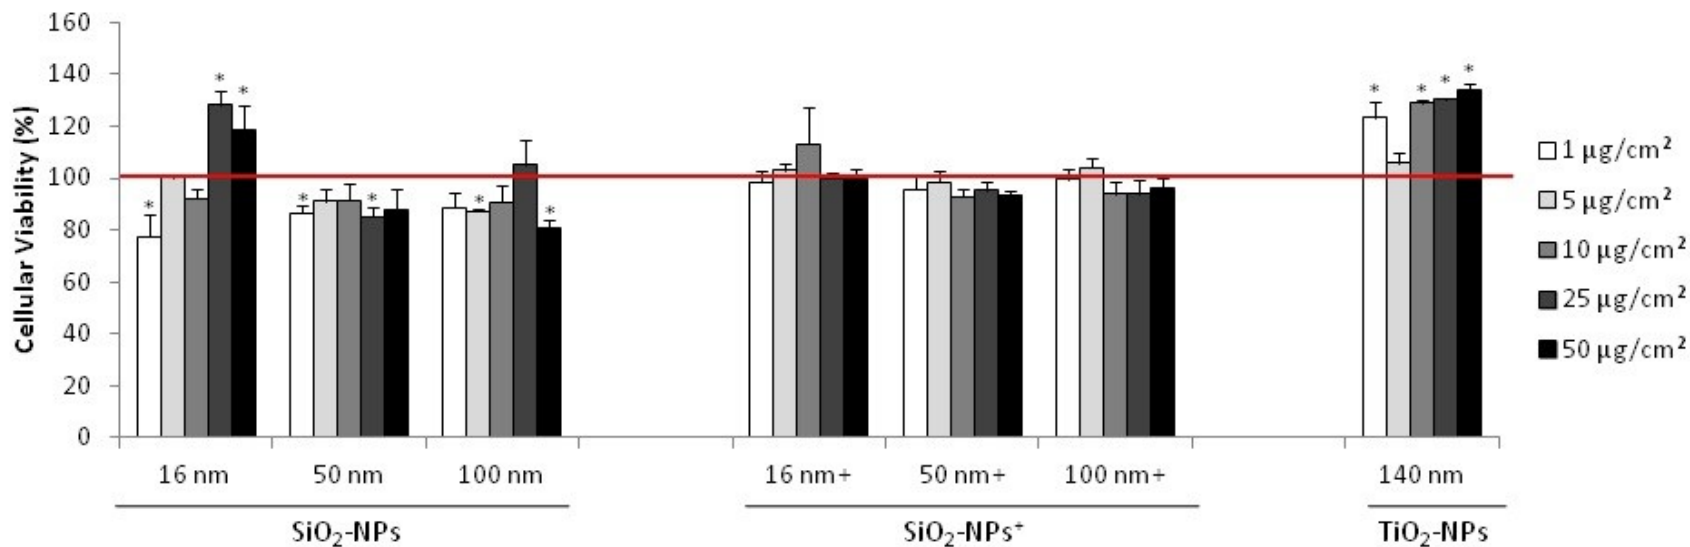

**B**

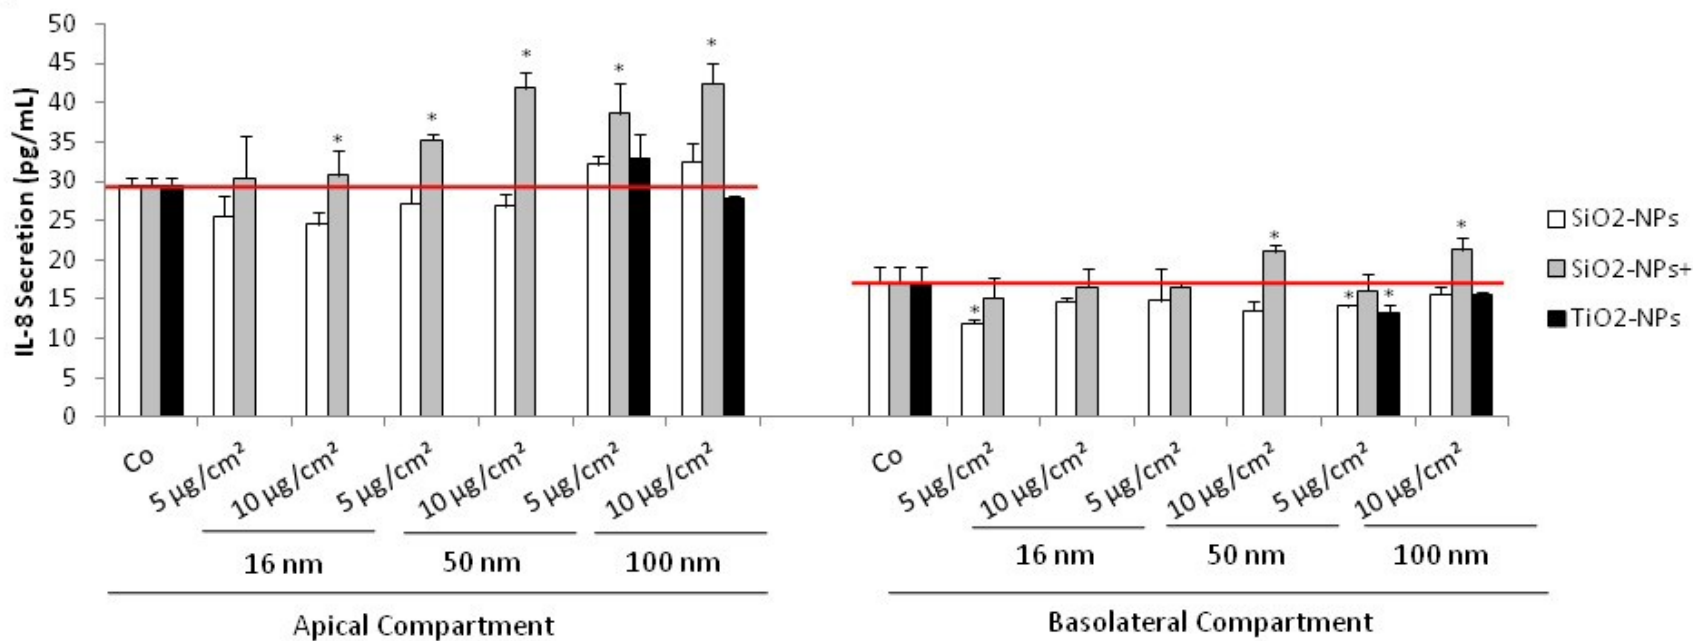

Supplement: c4nr07079h5.pdf [file c4nr07079h5.pdf]

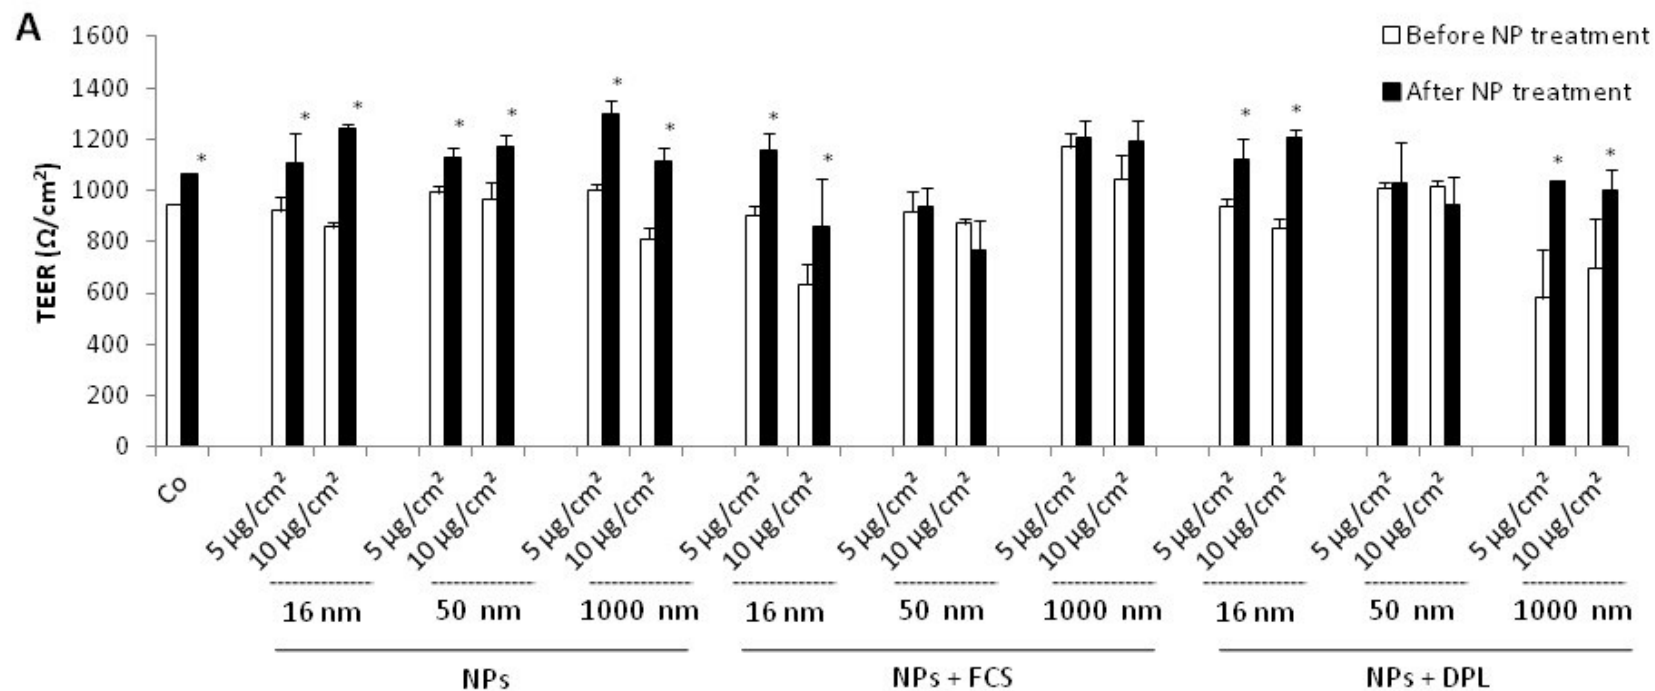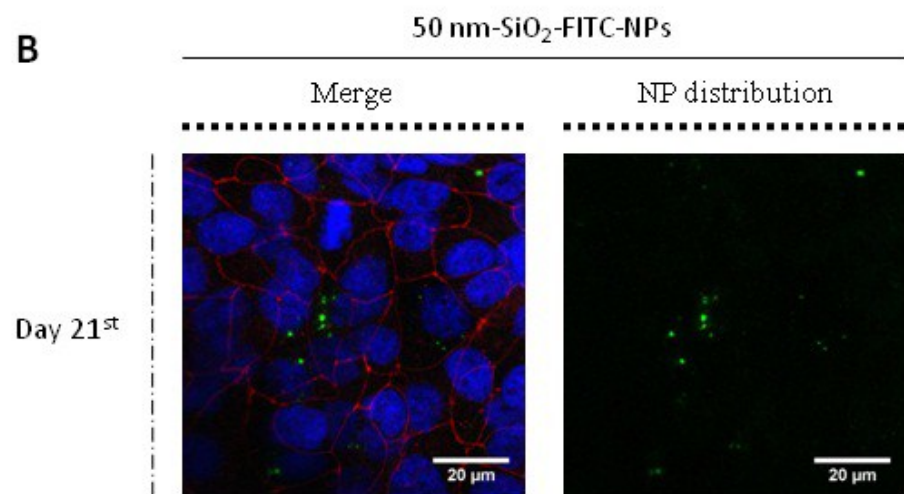

Supplement: c4nr07079h6.pdf [file c4nr07079h6.pdf]

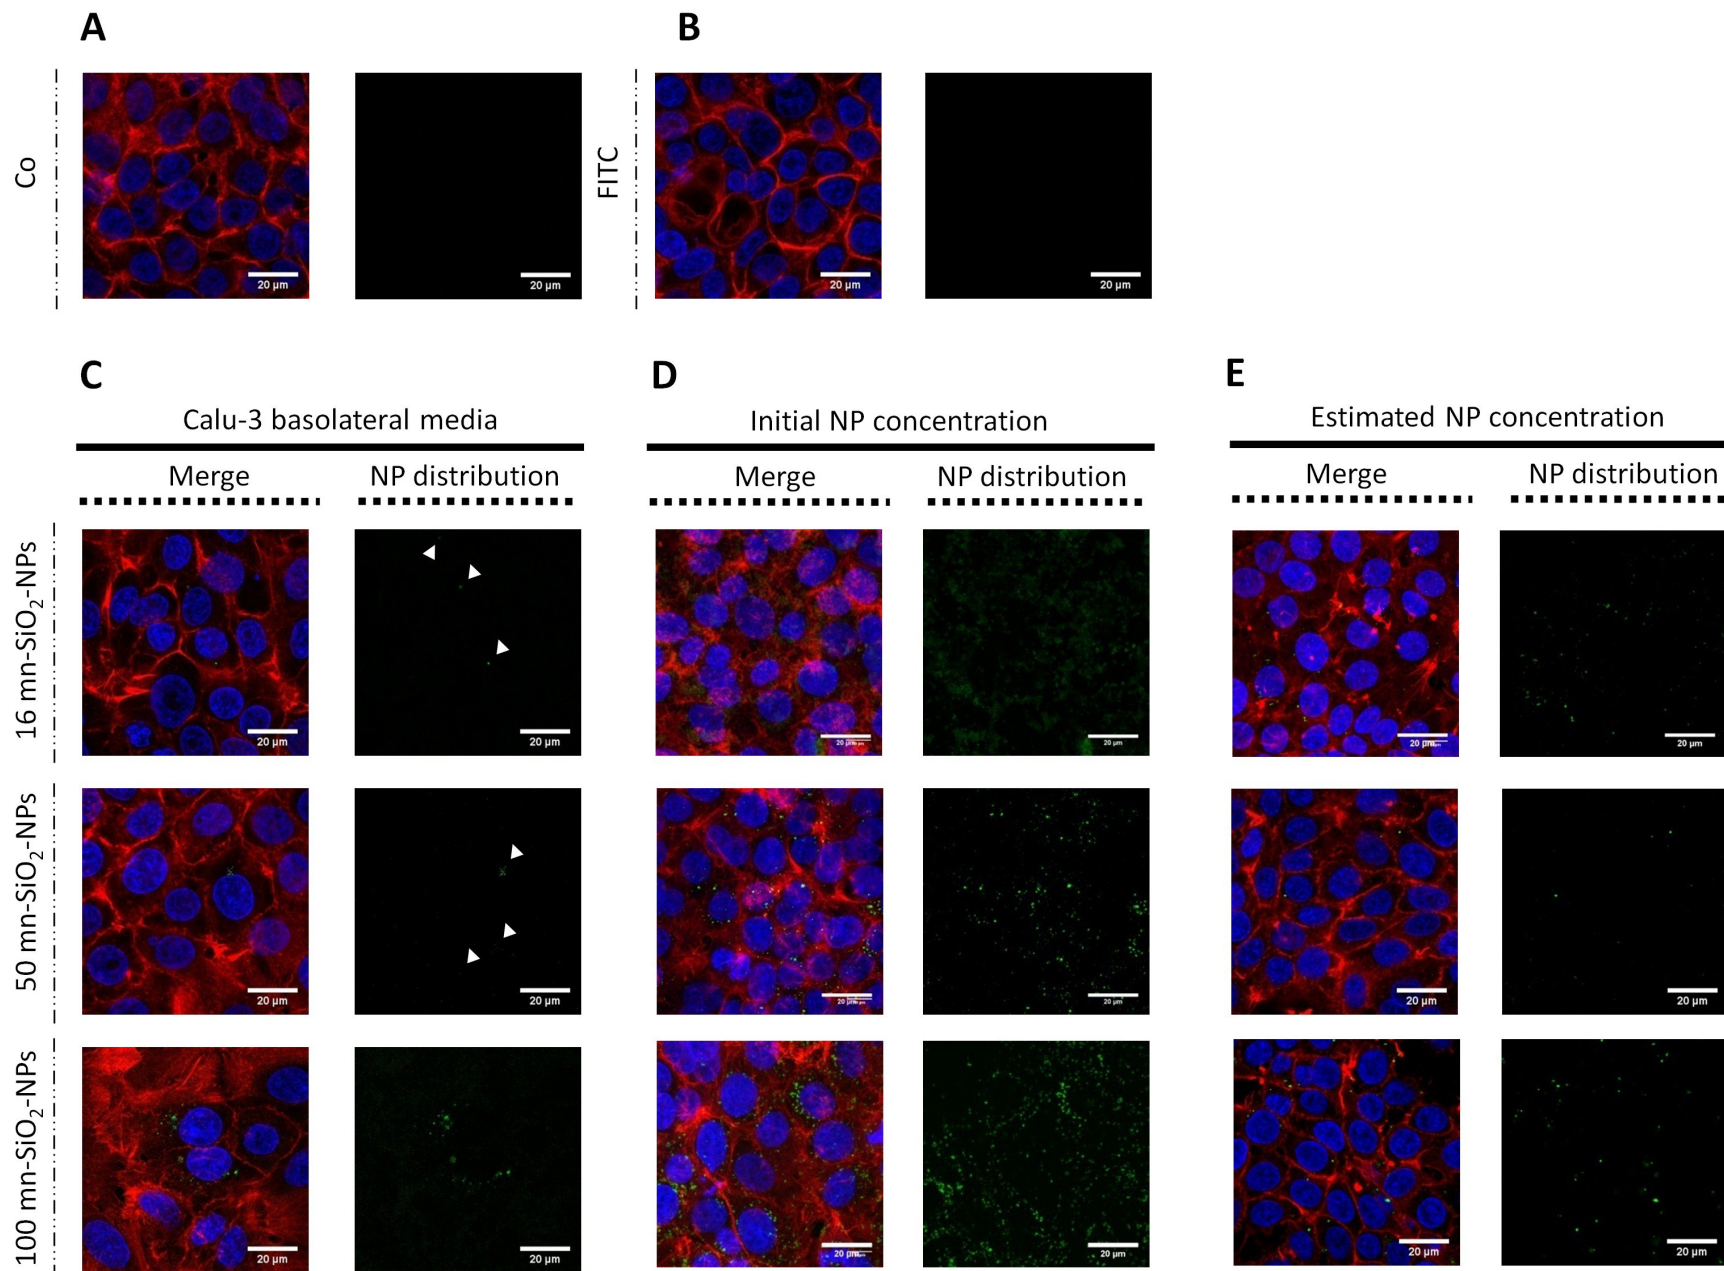

Supplement: c4nr07079h7.pdf [file c4nr07079h7.pdf]

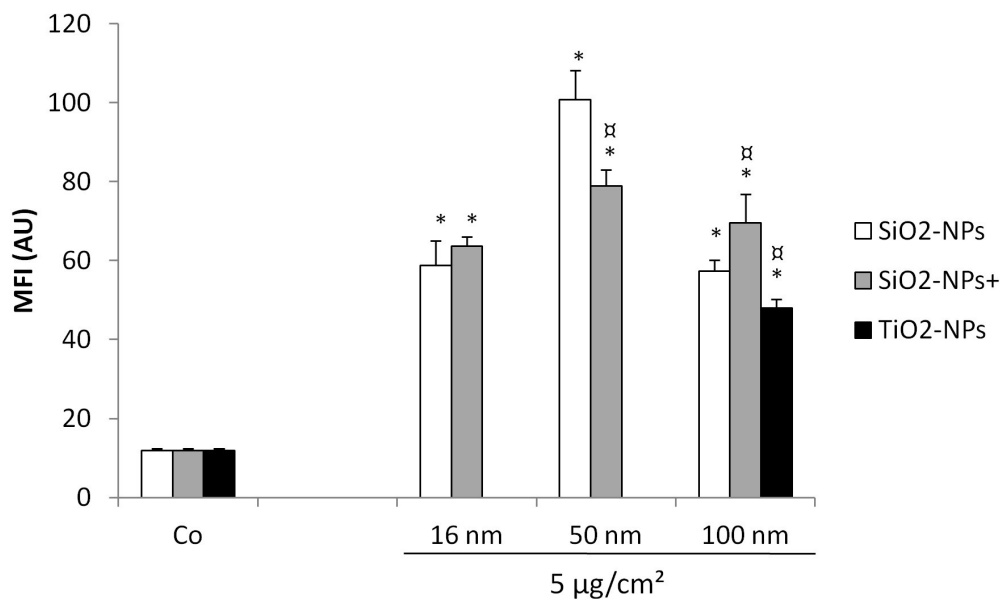

Supplement: c4nr07079h8.pdf [file c4nr07079h8.pdf]
